# Supplementary material for: Evolution, heterogeneity and global dispersal of cosmopolitan genotype: The most widespread genotype of Dengue Virus type 2
Source: Research Square preprint supplement (doi:10.21203/rs.3.rs-389331/v1), 2021-04-07
Supplement: Supplementary file 1 [file de6d7ff046f258999cfa140a.docx]

**Supplementary Table 3: Unique amino acid signature of Indian lineage as compared to non-Indian lineages of cosmopolitan genotype and other non-sylvatic genotypes of DENV-2.**

| Polyprotein position | Gene | Gene position | REF¶ | Other genotypes | Indian lineage | Cosmo lineages (Excluding Indian lineage) |
| --- | --- | --- | --- | --- | --- | --- |
| 112 | C | 112 | V | V/A | A (97%) | V (100%) |
| 143 | preM | 29 | D | D | D (100%) | N (100%) |
| 332 | E | 52 | Q | Q/E | Q (100%) | H (97%) |
| 906 | NS1 | 131 | Q | Q | Q (100%) | H (98%) |
| 1190 | NS2A | 63 | T | T | A (97%) | T (97%) |
| 1260 | NS2A | 133 | V | V/A | I (96%) | V (98%) |
| 1342 | NS2A | 215 | S | S | N (99%) | S (99%) |
| 1408 | NS2B | 63 | D | D | D (100%) | E (98%) |
| 1548 | NS3 | 73 | K | K | R (97%) | K (100%) |
| 1748 | NS3 | 273 | V | V | V (100%) | I (98%) |
| 1936 | NS3 | 461 | I | I | I (98%) | V (97%) |
| 2487 | NS4B | 244 | T | T | T (95%) | A (100%) |
| 2589 | NS5 | 98 | R | R | R (98%) | K (98%) |
| 3096 | NS5 | 605 | G | G | G (100%) | V (98%) |
| 3107 | NS5 | 616 | E | E | G (98%) | E (100%) |
| 3136 | NS5 | 645 | N | N | D (96%) | N (100%) |

¶REF=NCBI refseq accession number NC_001474.2
